# Supplementary material for: Live imaging of H3K9 acetylation in plant cells
Source: PubMed Central journal article supplement (PMC5394682; doi:10.1038/srep45894), 2017-04-18
Supplement: srep45894-s1.pdf [file srep45894-s1.pdf]

## Supplementary information

Live imaging of H3K9 acetylation in plant cells

Kazuki Kurita<sup>1,7</sup>, Takuya Sakamoto<sup>1,7</sup>, Noriyoshi Yagi<sup>1</sup>, Yuki Sakamoto<sup>2</sup>, Akihiro Ito<sup>3</sup>, Norikazu Nishino<sup>4</sup>, Kaori Sako<sup>5</sup>, Minoru Yoshida<sup>3</sup>, Hiroshi Kimura<sup>6</sup>, Motoaki Seki<sup>5</sup>, and Sachihiko Matsunaga<sup>1,2\*</sup>

<sup>1</sup>*Department of Applied Biological Science, Faculty of Science and Technology, Tokyo University of Science, 2641 Yamazaki, Noda, Chiba 278-8510 Japan*

<sup>2</sup>*Imaging Frontier Center, Organization for Research Advancement, Tokyo University of Science, 2641 Yamazaki, Noda, Chiba 278-8510 Japan*

<sup>3</sup>*Chemical Genomics Research Group, RIKEN Center for Sustainable Resource Science, 2-1 Hirosawa, Wako, Saitama, 351-0198 Japan*

<sup>4</sup>*Graduate School of Life Science and Systems Engineering, Kyushu Institute of Technology, Kitakyushu, 808-0196 Japan*

<sup>5</sup>*Plant Genomic Network Research Team, RIKEN Center for Sustainable Resource Science, 1-7-22 Suehiro-cho, Tsurumi-ku, Yokohama, Kanagawa, 230-0045 Japan*

<sup>6</sup>*Graduate School of Bioscience and Biotechnology, Tokyo Institute of Technology, 4259*

*Nagatsuta, Midori-ku, Yokohama, 226-8501 Japan*

<sup>7</sup>These authors equally contributed to this work.

\*For correspondence

Sachihiro Matsunaga

*Department of Applied Biological Science, Faculty of Science and Technology, Tokyo University*

*of Science, 2641 Yamazaki, Noda, Chiba 278-8510, Japan.*

Phone: +81-4-7124-1501      Fax: +81-4-7122-9104      E-mail: [sachi@rs.tus.ac.jp](mailto:sachi@rs.tus.ac.jp)

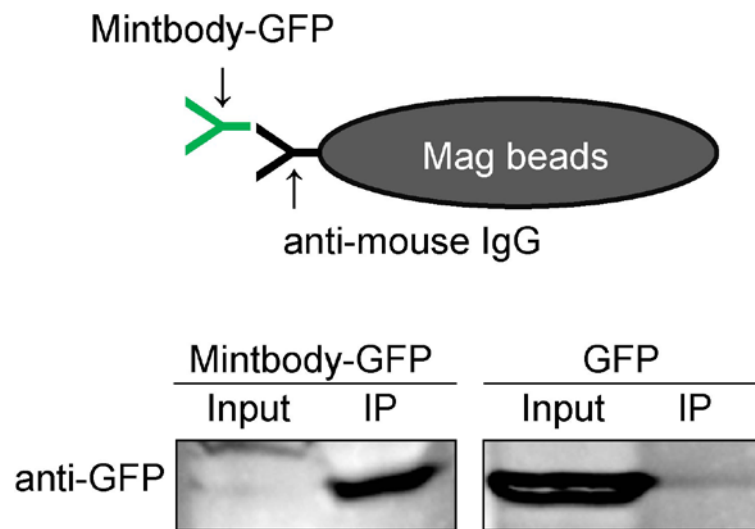

**Supplementary Figure S1. H3K9ac-mintbody-GFP expressed in plant cells can bind to anti-mouse IgG.**

Whole cell extracts from H3K9ac-mintbody-GFP or GFP expressing tobacco BY-2 cells were subjected to immunoprecipitation with anti-mouse IgG antibody on magnetic beads. After the immunoprecipitation, H3K9ac-mintbody-GFP and GFP were detected by immunoblotting. Only H3K9ac-mintbody-GFP was immunoprecipitated with the anti-mouse IgG antibody. For the full-length western blots see Supplementary Fig. S5.

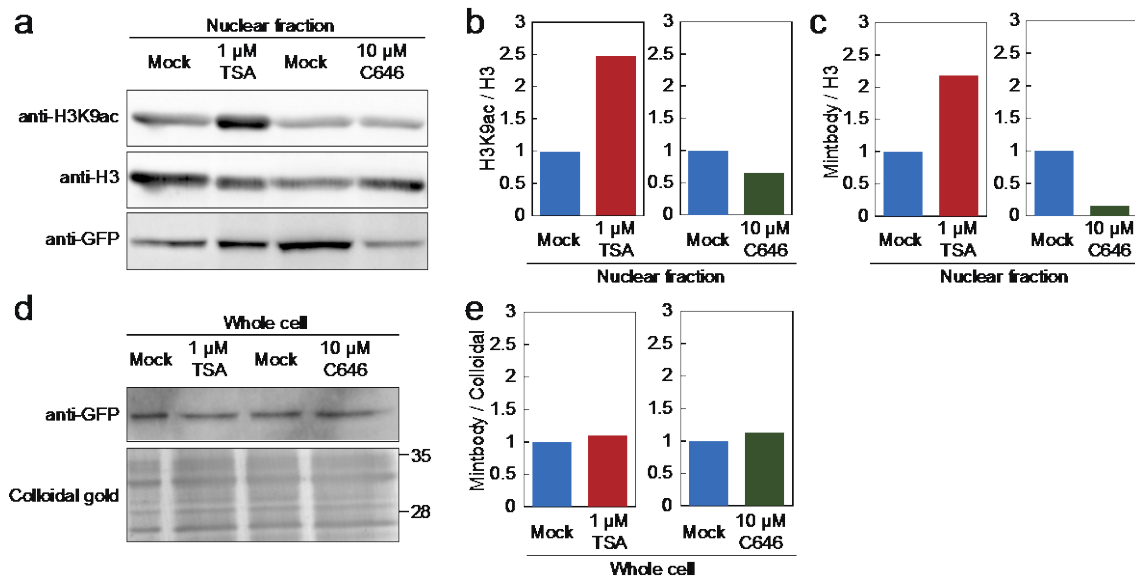

**Supplementary Figure S2. The amount of nuclear H3K9ac-mintbody-GFP was correlated with the amount of H3K9ac in tobacco BY-2 cells.**

(a) Immunoblotting analysis of H3K9ac, H3, and H3K9ac-mintbody-GFP in the nuclear fractions of tobacco BY-2 cells treated with 1  $\mu$ M TSA and 10  $\mu$ M C646. The H3 level was used as a loading control. For the full-length western blots see Supplementary Fig. S6a.

(b, c) Quantitative analysis of the levels of nuclear H3K9ac (b) and H3K9ac-mintbody-GFP (c). The intensity of each band shown in (a) was analysed with ImageJ. Each protein level was normalized to the H3 level.

(d) Immunoblotting analysis of H3K9ac-mintbody-GFP in whole cell fractions of tobacco BY-2 cells treated with 1  $\mu$ M TSA and 10  $\mu$ M C646. The loaded proteins were stained with colloidal gold. For the full-length western blots see Supplementary Fig. S6b.

(e) Quantitative analysis of the levels of whole cell H3K9ac-mintbody-GFP. The intensity of each band shown in (d) was analysed with ImageJ. Each protein level was normalized to the level of the proteins stained with colloidal gold.

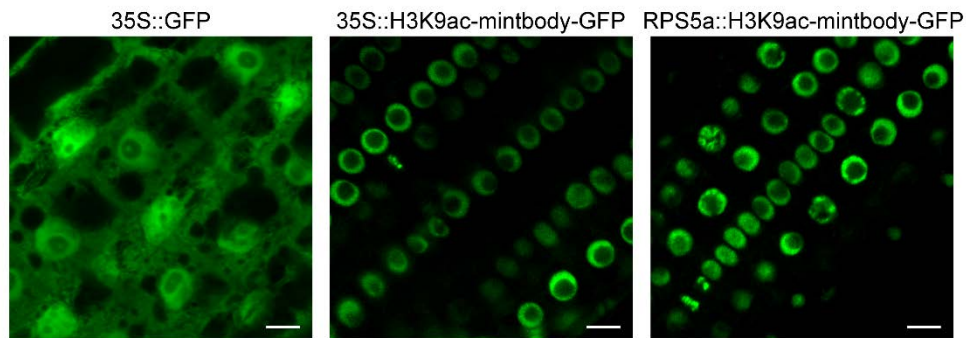

**Supplementary Figure S3. H3K9ac-mintbody-GFP is unlikely to be expressed in the cytoplasm under the control of the 35S or RPS5a promoter.**

Root cells of *A. thaliana* expressing GFP and H3K9ac-mintbody-GFP under the control of the 35S or RPS5a promoter were observed by confocal laser microscopy. T<sub>2</sub> plants were used for the H3K9ac-mintbody-GFP observations. Compared with GFP alone, H3K9ac-mintbody-GFP was not visible in the cytoplasm. Bars, 10  $\mu$ m.

**Supplementary Table S1. Characteristics of Ky-2 and Ky-14.**

|       | R                                                  | composition                                                   | Mw     | <i>in vitro</i> IC <sub>50</sub> inhibitory activity (±S.D.) |                      |                      |
|-------|----------------------------------------------------|---------------------------------------------------------------|--------|--------------------------------------------------------------|----------------------|----------------------|
|       |                                                    |                                                               |        | HDAC1                                                        | HDAC4                | HDAC6                |
| Ky-2  | CONHOH                                             | C <sub>26</sub> H <sub>37</sub> O <sub>6</sub> N <sub>5</sub> | 515.60 | 0.00873 μM ± 0.00056                                         | 0.01997 μM ± 0.00217 | 0.16345 μM ± 0.01243 |
| Ky-14 | COCH <sub>2</sub> N(CH <sub>3</sub> ) <sub>3</sub> | C <sub>29</sub> H <sub>32</sub> O <sub>5</sub> N <sub>5</sub> | 541.68 | 19.98 μM ± 3.16                                              | 17.86 μM ± 1.93      | >100 μM              |

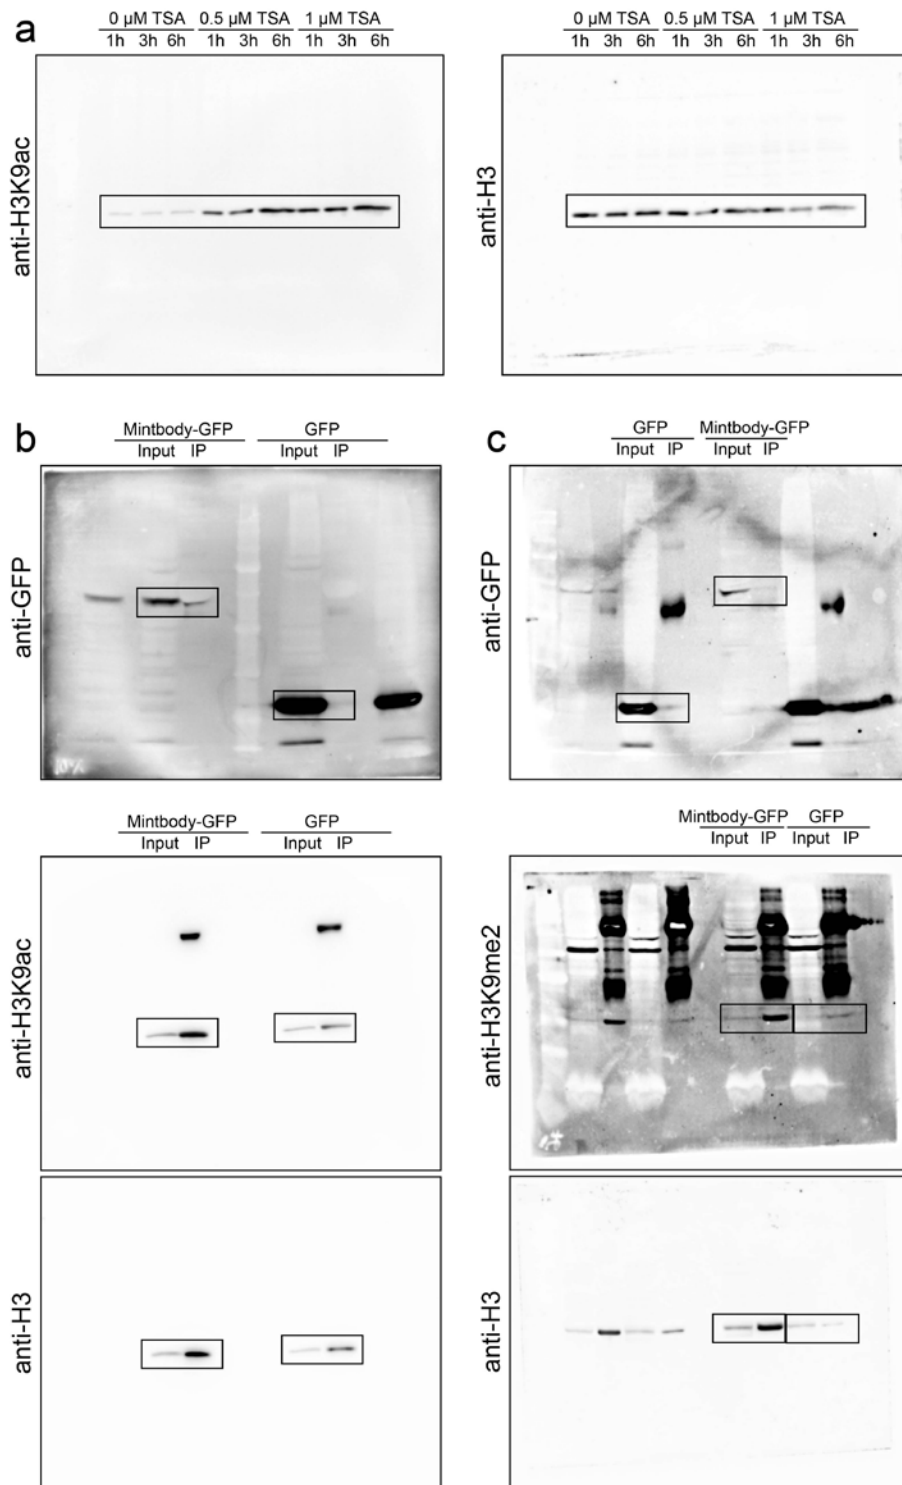

**Supplementary Figure S4. Full-length Western blots from Fig.1.**

Full-length western blot shown in Figure 1a (a), in Figure 1b (b), and in Figure 1c (c). Lanes used are outline with a black rectangle.

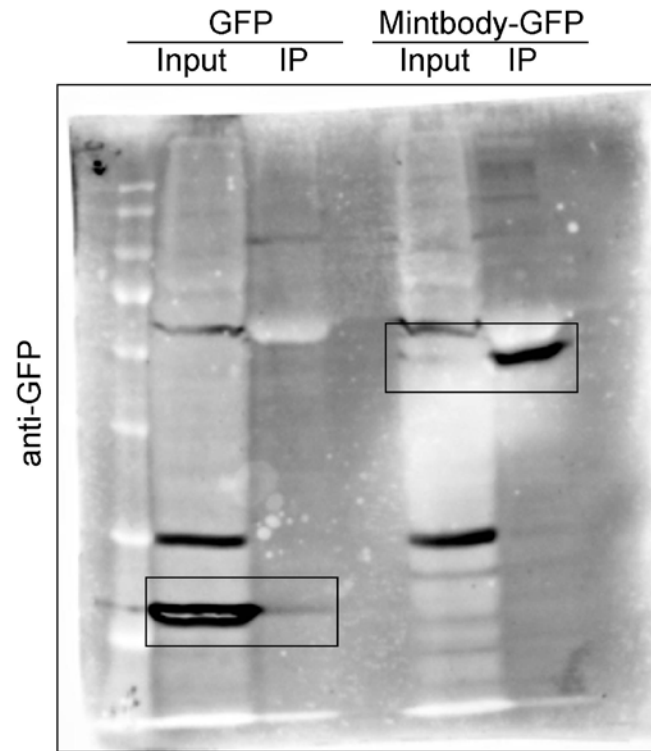

**Supplementary Figure S5. Full-length Western blots from Supplementary Fig.S1.**

Lanes used are outline with a black rectangle.



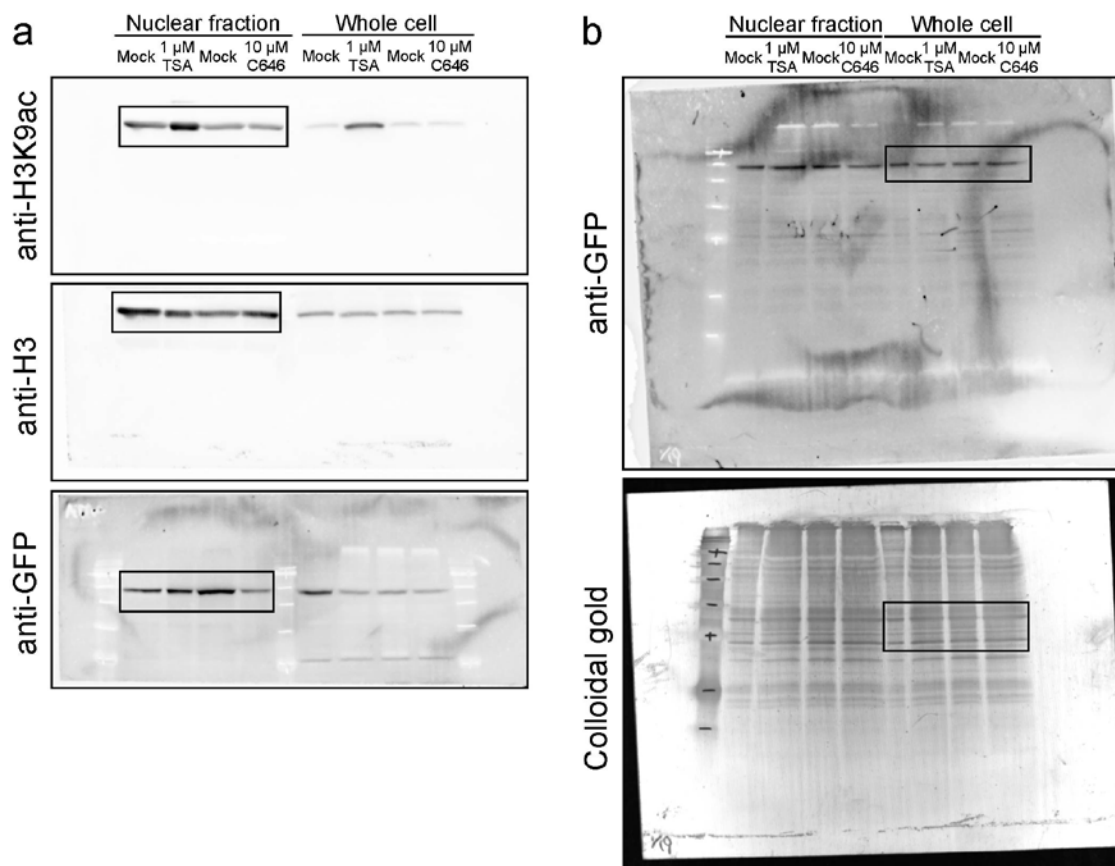

**Supplementary Figure S6. Full-length Western blots from Supplementary Fig.S2.**

Full-length western blot shown in Supplementary Figure S2a (a), and in Supplementary Figure S2d (b). Lanes used are outline with a black rectangle.
